# Supplementary material for: Oncometabolite induced primary cilia loss in pheochromocytoma
Source: PubMed Central journal article supplement (PMC6215910; doi:10.1530/erc-18-0134), 2018-09-05
Supplement: erc-26-165-s005.pdf [file erc-26-165-s005.pdf]

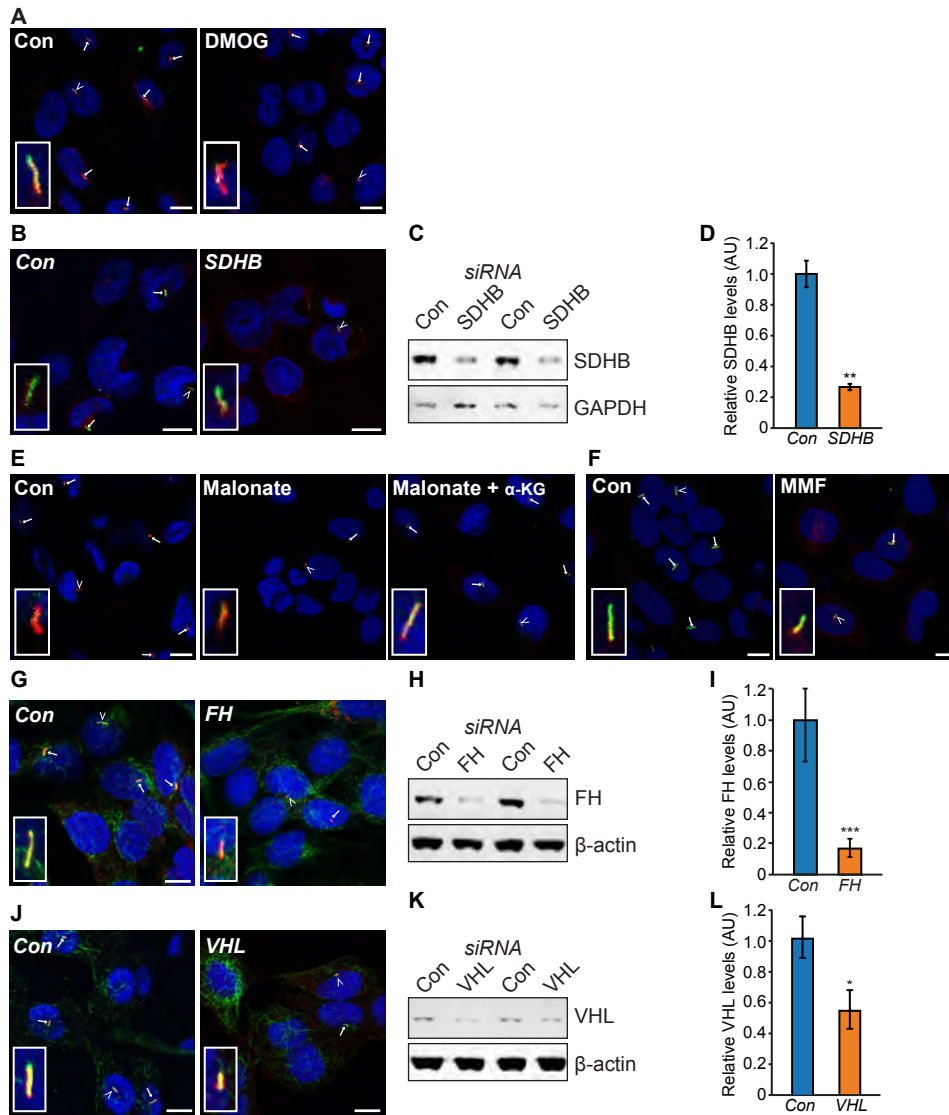

**Figure S5. Primary cilia are lost from PC12 cells when the function of SDH, FH or VHL is targeted.** **(A)** Confocal images of PC12 cells immunolabelled for detection of primary cilia after 24 hours treatment with DMOG. **(B)** Confocal images of PC12 cells immunolabelled for detection of primary cilia following siRNA mediated knockdown of SDHB. **(C, D)** Immunoblot **(C)** and densitometric analyses **(D)** of total cell lysates from PC12 cells transfected with siRNAs targeting SDHB or non-targeting control siRNAs (Con) and probed with antibodies against SDHB and GAPDH as a loading control. Data were normalised to GAPDH (n=6). **(E)** Confocal images of PC12 cells immunolabelled for detection of primary cilia after 24 hours treatment with malonate alone or with  $\alpha$ -ketoglutarate ( $\alpha$ -KG) **(F)** Confocal images of PC12 cells immunolabelled for detection of primary cilia after 24 hours treatment with monomethyl fumarate (MMF). **(G)** Confocal images of PC12 cells immunolabelled for detection of primary cilia following siRNA mediated knockdown of FH. **(H, I)** Immunoblot **(H)** and densitometric analyses **(I)** of total cell lysates from PC12 cells transfected with siRNAs targeting FH or non-targeting control siRNAs (Con) and probed with antibodies against FH and  $\beta$ -actin as a loading control. Data were normalised to  $\beta$ -actin (n=6). **(J)** Confocal images of PC12 cells immunolabelled for detection of primary cilia following siRNA mediated knockdown of VHL. **(K, L)** Immunoblot **(K)** and densitometric analyses **(L)** of total cell lysates from PC12 cells transfected with siRNAs targeting VHL or non-targeting control siRNAs (Con) and probed with antibodies against VHL and  $\beta$ -actin as a loading control. Data were normalised to  $\beta$ -actin (n=6). Scale bars = 10 $\mu$ m. Error bars indicate 2x SEM. Statistical tests used: t-test (C, H, K). \* P<0.05, \*\*P<0.01, \*\*\*P<0.001.
