# Supplementary material for: Oncometabolite induced primary cilia loss in pheochromocytoma
Source: PubMed Central journal article supplement (PMC6215910; doi:10.1530/erc-18-0134), 2018-09-05
Supplement: erc-26-165-s006.pdf [file erc-26-165-s006.pdf]

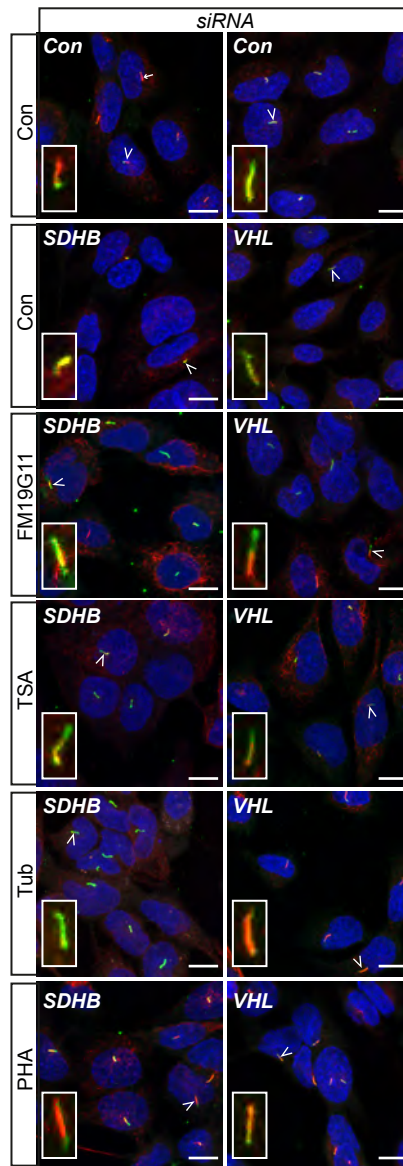

**Figure S6. Confocal imaging shows inhibition of both the Aurora-A/HDAC6 cilia resorption pathways and of hypoxic signalling prevents cilia loss in SDHB and VHL knockdown cells.** Confocal images of PC12 cells 48 hours after transfection with siRNAs targeting SDHB or VHL in the presence or absence of the inhibitors FM19G11, TSA, tubacin (Tub) and PHA-680632 (PHA), or vehicle only controls. Cells transfected with non-targeting control siRNAs (*Con*) were treated with the same inhibitors. Scale bar = 10µm.
