# Supplementary material for: Oncometabolite induced primary cilia loss in pheochromocytoma
Source: PubMed Central journal article supplement (PMC6215910; doi:10.1530/erc-18-0134), 2018-09-05
Supplement: erc-26-165-t002.pdf [file erc-26-165-t002.pdf]

**Supplemental Table 1: Clinical details – paired samples**

| Sample ID (RNAseq ID)      | Sex | Age at operation | Pheo/PGL | Location | Mode of diagnosis | Syndromic | Genetics screening | Gene mutation | Max size/mm | NMN | MN  | 3MOT |
|----------------------------|-----|------------------|----------|----------|-------------------|-----------|--------------------|---------------|-------------|-----|-----|------|
| 1 <sup>A</sup> (H1-2)      | M   | 49               | Pheo     | Right    | Symptomatic       | No        | No                 |               | 36          | -   | +   | -    |
| 2 <sup>A</sup> (H3-4)      | F   | 71               | Pheo     | Right    | Incidental        | No        | No                 |               | 32          | +   | +   | -    |
| 3 <sup>A</sup> (H5-6)      | M   | 12               | Pheo     | Left     | Symptomatic       | No        | Yes                | Negative      | 58          | +++ | -   | +    |
| 4 <sup>A,B</sup> (H7-10)   | M   | 37               | Pheo     | Left     | Screening         | Yes       | Yes                | MEN2          | 14          | -   | +   | -    |
| 5 <sup>A</sup> (H11-12)    | F   | 31               | Pheo     | Left     | Symptomatic       | No        | Yes                | Negative      | 49          | +++ | -   | +    |
| 6 <sup>A</sup> (H13-14)    | M   | 18               | Pheo     | Left     | Screening         | Yes       | Yes                | VHL           | 32          | ++  | -   | +    |
| 7 <sup>A</sup> (H15-16)    | M   | 69               | Pheo     | Right    | Incidental        | No        | No                 |               | 80          | +++ | +++ | +    |
| 8 <sup>A</sup> (H17-18)    | M   | 39               | Pheo     | Left     | Incidental        | No        | Yes                | SDHB          | 48          | +   | -   | -    |
| 9 <sup>A</sup> (H19-20)    | F   | 34               | Pheo     | Right    | Symptomatic       | No        | Yes                | Negative      | 76          | +++ | -   | +    |
| 10 <sup>A</sup> (H21-22)   | M   | 64               | Pheo     | Left     | Incidental        | No        | Yes                | Negative      | 33          | +   | -   | -    |
| 11 <sup>A,C</sup> (H23-24) | M   | 14               | Pheo     | Right    | Screening         | Yes       | Yes                | VHL           | 14          | +   | -   | +    |
| 12                         |     | 14               |          | Left     | Screening         | Yes       | Yes                | VHL           | 8           | +   | -   | -    |
| 13                         | F   | 27               | Pheo     | Right    | Symptomatic       | No        | Yes                | Negative      | 54          | +++ | -   | +    |
| 14                         | F   | 66               | Pheo     | Right    | Incidental        | No        | No                 |               | 47          | +   | -   | -    |
| 15                         | F   | 69               | Pheo     | Right    | Incidental        | No        | No                 |               | 57          | +   | -   | -    |
| 16                         | F   | 13               | Pheo     | Left     | Symptomatic       | Yes       | Yes                | VHL           | 23          | +++ | -   | -    |
| 17                         |     | 13               |          | Right    | Symptomatic       | Yes       | Yes                | VHL           | 49          | +++ | -   | -    |
| 18                         | F   | 35               | Pheo     | Right    | Incidental        | No        | Yes                | Negative      | 73          | ++  | +++ | +    |
| 19                         | F   | 78               | Pheo     | Left     | Incidental        | No        | No                 |               | 45          | +   | ++  | -    |
| 20                         | M   | 63               | Pheo     | Right    | Incidental        | No        | No                 |               | 35          | +   | ++  | -    |
| 21                         | F   | 52               | Pheo     | Right    | Symptomatic       | No        | No                 |               | 30          | +   | +   | -    |
| 22                         | M   | 43               | Pheo     | Right    | Incidental        | No        | No                 |               | 56          | ++  | +++ | -    |
| 23                         | M   | 46               | Pheo     | Right    | Symptomatic       | No        | Yes                | Negative      | 75          | ++  | -   | +    |
| 24                         | F   | 74               | Pheo     | Left     | Incidental        | No        | No                 |               | 76          | ++  | +++ | ++   |
| 25                         | F   | 50               | Pheo     | Right    | Incidental        | No        | Yes                | Negative      | 80          | ++  | +++ | +    |
| 26                         | F   | 60               | Pheo     | Right    | Incidental        | No        | No                 |               | 87          | +++ | +++ | +    |
| 27                         | M   | 56               | Pheo     | Right    | Incidental        | No        | No                 |               | 55          | +   | ++  | -    |

**Supplemental Table 1: Clinical details of 27 paired samples of tumour and adjacent adrenal samples from 25 individuals.** F female, M male. Pheo pheochromocytoma, PGL paraganglioma. Mode of diagnosis – symptomatic = diagnosis due to symptoms or signs of catecholamine excess leading to diagnosis; incidental = diagnosis due to investigation for another unrelated condition; screening = diagnosis during a screening programme in individuals with known pheo/PGL predisposition. SDHB succinate dehydrogenase B, VHL von Hippel-Lindau, MEN2 Multiple Endocrine Neoplasia Type 2. NMN normetanephrine, MN metanephrine, 3MOT 3-methoxytyramine; - not elevated, + elevated 1-5x upper limit of normal (ULN), ++ elevated 5-10x ULN, +++ elevated >10x ULN.

<sup>A</sup> Samples included in the RNAseq analysis (RNAseq sample ID in brackets; odd number adrenal medulla, even number pheochromocytoma)

<sup>B</sup> Patient 4 had synchronous bilateral disease which was included in RNAseq analysis but immunochemistry was only available in the left pheochromocytoma

<sup>C</sup> Patient 11 had metachronous bilateral disease and RNAseq was performed on one set of paired samples only
