# Supplementary material for: Oncometabolite induced primary cilia loss in pheochromocytoma
Source: PubMed Central journal article supplement (PMC6215910; doi:10.1530/erc-18-0134), 2018-09-05
Supplement: erc-26-165-t003.pdf [file erc-26-165-t003.pdf]

**Supplemental Table 2: Clinical details – unpaired samples**

| ID | Sex | Age at operation | Pheo/PGL | Location | Mode of diagnosis | Syndromic | Genetics screening | Gene mutation | Max size/mm | NMN | MN  | 3MOT |
|----|-----|------------------|----------|----------|-------------------|-----------|--------------------|---------------|-------------|-----|-----|------|
| 28 | M   | 43               | PGL      | H&N      | Symptomatic       | Yes       | Yes                | SDHB          | 20          | -   | -   | -    |
| 29 | F   | 44               | PGL      | H&N      | Symptomatic       | Yes       | Yes                | SDHB          | 18          | -   | -   | -    |
| 30 | F   | 68               | PGL      | Bladder  | Symptomatic       | Yes       | Yes                | SDHB          | 45          | +   | -   | +++  |
| 31 | F   | 49               | PGL      | Thoracic | Symptomatic       | Yes       | Yes                | SDHA          | 58          | +   | -   | ++   |
| 32 |     |                  |          |          | Yes               | Yes       | SDHA               |               |             |     |     |      |
| 33 |     |                  |          |          | Yes               | Yes       | SDHA               |               |             |     |     |      |
| 34 | M   | 15               | Pheo     | Right    | Screening         | Yes       | Yes                | VHL           | 35          | +   | -   | -    |
| 35 |     |                  |          |          | Screening         | Yes       | Yes                | VHL           |             |     |     |      |
| 36 |     |                  |          |          | Screening         | Yes       | Yes                | VHL           |             |     |     |      |
| 37 | F   | 43               | Pheo     | Right    | Incidental        | No        | Yes                | Negative      | 60          | +++ | +   | -    |
| 38 | F   | 53               | PGL      | Abdo     | Incidental        | No        | No                 |               | 56          | +   | -   | -    |
| 39 | M   | 45               | Pheo     | Right    | Symptomatic       | No        | No                 |               | 110         | +++ | +++ | +    |
| 40 | M   | 66               | Pheo     | Right    | Incidental        | No        | Yes                | Negative      | 120         | +++ | -   | ++   |
| 41 | F   | 50               | PGL      | Abdo     | Incidental        | No        | No                 |               | 52          | ++  | -   | -    |
| 42 | F   | 36               | PGL      | Abdo     | Symptomatic       | Yes       | Yes                | VHL           | 25          | +   | -   | -    |
| 43 | M   | 65               | PGL      | Abdo     | Incidental        | No        | No                 |               | 45          | +   | -   | -    |
| 44 | M   | 39               | PGL      | H&N      | Symptomatic       | No        | Yes                | Negative      | 20          | -   | -   | -    |
| 45 | M   | 37               | Pheo     | Right    | Screening         | Yes       | Yes                | MEN2          | 13          | -   | +   | -    |
| 46 | F   | 40               | PGL      | Abdo     | Incidental        | Yes       | Yes                | SDHB          | 39          | +   | -   | -    |
| 47 |     |                  |          |          |                   |           |                    |               | 33          |     |     |      |

**Supplemental Table 2: Clinical details of 20 tumour samples from 15 individuals.**

F female, M male. Pheo pheochromocytoma, PGL paraganglioma. H&N head and neck, abdo abdominal. Mode of diagnosis – symptomatic = diagnosis due to symptoms or signs of catecholamine excess leading to diagnosis; incidental = diagnosis due to investigation for another unrelated condition; screening = diagnosis during a screening programme in individuals with known pheo/PGL predisposition. SDH succinate dehydrogenase, VHL von Hippel-Lindau, MEN2 Multiple Endocrine Neoplasia Type 2. NMN normetanephrine, MN metanephrine, 3MOT 3-methoxytyramine; - not elevated, + elevated 1-5x ULN, ++ elevated 5-10x ULN, +++ elevated >10x ULN.
